# Supplementary material for: Impact of COVID-19 Diagnosis on Mortality in Patients with ST-Elevation Myocardial Infarction Hospitalized during the National Outbreak in Italy
Source: MDPI journal article supplement (doi:10.3390/jcm11247350), 2022-12-10
Supplement: s1 [file s1]

**Supplementary Table S1.** ICD9-CM codes used to retrieve information on risk factors and comorbidities.

|                                                             | ICD9 Code                                               |                                                                  |
|-------------------------------------------------------------|---------------------------------------------------------|------------------------------------------------------------------|
|                                                             | Index admission                                         | Previous admission                                               |
| Hypertension                                                |                                                         | 401-405                                                          |
| Diabetes                                                    |                                                         | 250.0-250.9                                                      |
| Heart failure                                               |                                                         | 428                                                              |
| Ill-defined descriptions and complications of heart disease |                                                         | 429                                                              |
| Cerebrovascular disease                                     | 433, 437, 438                                           | 430-432, 433, 434, 436, 437, 438                                 |
| Vascular disease                                            | 440-448 (except 441.1, 441.3, 441.5, 441.6, 444), 557.1 | 440-448, 557                                                     |
| Chronic coronary syndromes                                  |                                                         | 411, 413, 414                                                    |
| Arrhythmias                                                 |                                                         | 426, 427                                                         |
| Anemia                                                      | 280-284, 285 (except 285.1)                             | 280-284, 285 (except 285.1)                                      |
| Blood clotting defects                                      | 286                                                     | 286                                                              |
| Other hematological diseases                                | 287-289                                                 | 287-289                                                          |
| Cardiomyopathy                                              | 425                                                     | 425                                                              |
| Rheumatic heart disease                                     | 393-398                                                 | 391, 393-398                                                     |
| Endocarditis and acute myocarditis                          |                                                         | 421, 422                                                         |
| Other chronic heart conditions                              | 745, V15.1, V42.2, V43.2, V43.3, V45.0                  | 745, V15.1, V42.2, V43.2, V43.3, V45.0                           |
| Chronic kidney diseases                                     | 582, 583, 585-588                                       | 582, 583, 585-588                                                |
| Chronic disease (liver, pancreas, intestine)                | 571, 572, 577.1-577.9, 555, 556                         | 571, 572, 577.1-577.9, 555, 556                                  |
| Obesity                                                     | 278.0                                                   | 278.0                                                            |
| Chronic obstructive pulmonary disease                       |                                                         | 491, 492, 494, 496                                               |
| Malignant neoplasms                                         | 140.0-208.9, V10                                        | 140.0-208.9, V10                                                 |
| Previous vascular surgery                                   |                                                         | 38-39.5 (except: 38.01, 38.02, 38.5, 38.11, 38.12, 38.31, 38.32) |
| Previous cerebral revascularization                         |                                                         | 00.61, 00.62, 38.01, 38.02, 38.11, 38.12, 38.31, 38.32           |
| Other previous cardiac surgery than CABG                    |                                                         | 35, 37.0, 37.1, 37.3, 37.4, 37.5, 37.6, 37.9                     |

**Supplementary Table S2** Baseline characteristics of STEMI patients enrolled in 2020 with and without a COVID-19 diagnosis.

|                                                                    | <b>NO COVID (N=3878)</b> | <b>COVID (N=170)</b> | <b>P value</b> |
|--------------------------------------------------------------------|--------------------------|----------------------|----------------|
| Age (years), mean±SD                                               | 66.6±13.0                | 70.5±11.7            | <0.0001        |
| Gender (female), n (%)                                             | 979 (25.2)               | 49 (28.8)            | 0.29           |
| Hypertension, n (%)                                                | 447 (11.5)               | 28 (16.5)            | 0.05           |
| Diabetes, n (%)                                                    | 250 (6.4)                | 15 (8.8)             | 0.22           |
| Heart failure, n (%)                                               | 136 (3.5)                | 8 (4.7)              | 0.41           |
| Ill-defined descriptions and complications of heart disease, n (%) | 29 (0.7)                 | 1 (0.6)              | 0.81           |
| Cerebrovascular disease, n (%)                                     | 159 (4.1)                | 14 (8.2)             | 0.009          |
| Cerebrovascular disease (ind. adm.), n (%)                         | 85 (2.2)                 | 1 (0.6)              | 0.16           |
| Vascular disease, n (%)                                            | 127 (3.3)                | 7 (4.1)              | 0.55           |
| Vascular disease (ind. adm.), n (%)                                | 77 (2.0)                 | 2 (1.2)              | 0.45           |
| Chronic coronary syndromes, n (%)                                  | 303 (7.8)                | 12 (7.1)             | 0.72           |
| Arrhythmias, n (%)                                                 | 185 (4.8)                | 11 (6.5)             | 0.31           |
| Anemia, n (%)                                                      | 105 (2.7)                | 12 (7.1)             | 0.001          |
| Anemia (ind. adm.) , n (%)                                         | 88 (2.3)                 | 5 (2.9)              | 0.57           |
| Blood clotting defects, n (%)                                      | 2 (0.1)                  | 0 (0.0)              | 0.77           |
| Blood clotting defects (ind. adm.), n (%)                          | 1 (0.0)                  | 0 (0.0)              | 0.83           |
| Other hematological diseases, n (%)                                | 17 (0.4)                 | 0 (0.0)              | 0.39           |
| Other hematological diseases (ind. adm.), n (%)                    | 22 (0.6)                 | 0 (0.0)              | 0.32           |
| Cardiomyopathy, n (%)                                              | 15 (0.4)                 | 0 (0.0)              | 0.42           |
| Cardiomyopathy (ind. adm.), n (%)                                  | 59 (1.5)                 | 1 (0.6)              | 0.32           |
| Rheumatic heart disease, n (%)                                     | 14 (0.4)                 | 0 (0.0)              | 0.43           |
| Rheumatic heart disease (ind. adm.), n (%)                         | 21 (0.5)                 | 1 (0.6)              | 0.93           |
| Endocarditis and acute myocarditis, n (%)                          | 3 (0.1)                  | 0 (0.0)              | 0.72           |
| Other chronic heart conditions, n (%)                              | 28 (0.7)                 | 0 (0.0)              | 0.27           |
| Other chronic heart conditions (ind.adm.), n (%)                   | 42 (1.1)                 | 1 (0.6)              | 0.54           |
| Chronic kidney disease, n (%)                                      | 129 (3.3)                | 10 (5.9)             | 0.07           |
| Chronic kidney diseases (ind. adm.), n (%)                         | 242 (6.2)                | 6 (3.5)              | 0.15           |

|                                                                       |            |           |      |
|-----------------------------------------------------------------------|------------|-----------|------|
| Other chronic disease (liver, pancreas, intestine), n (%)             | 38 (1.0)   | 2 (1.2)   | 0.80 |
| Other chronic disease (liver, pancreas, intestine) (ind. adm.), n (%) | 10 (0.3)   | 1 (0.6)   | 0.42 |
| Obesity, n (%)                                                        | 45 (1.2)   | 4 (2.4)   | 0.16 |
| Obesity (ind. adm.), n (%)                                            | 98 (2.5)   | 2 (1.2)   | 0.27 |
| Chronic obstructive pulmonary disease, n (%)                          | 99 (2.6)   | 5 (2.9)   | 0.75 |
| Malignant neoplasms, n (%)                                            | 257 (6.6)  | 16 (9.4)  | 0.16 |
| Previous MI                                                           | 321 (8.3)  | 20 (11.8) | 0.11 |
| Previous vascular surgery, n (%)                                      | 131 (3.4)  | 7 (4.1)   | 0.60 |
| Previous cerebral revascularization, n (%)                            | 17 (0.4)   | 1 (0.6)   | 0.77 |
| Previous CABG                                                         | 76 (2.0)   | 6 (3.5)   | 0.15 |
| Other previous cardiac surgery than CABG, n (%)                       | 43 (1.1)   | 0 (0.0)   | 0.17 |
| Previous PCI                                                          | 486 (12.5) | 24 (14.1) | 0.54 |

CABG: coronary artery bypass grafting; MI: myocardial infarction; PCI: percutaneous coronary intervention;

Note: ind. adm - comorbidity information retrieved at the index admission.

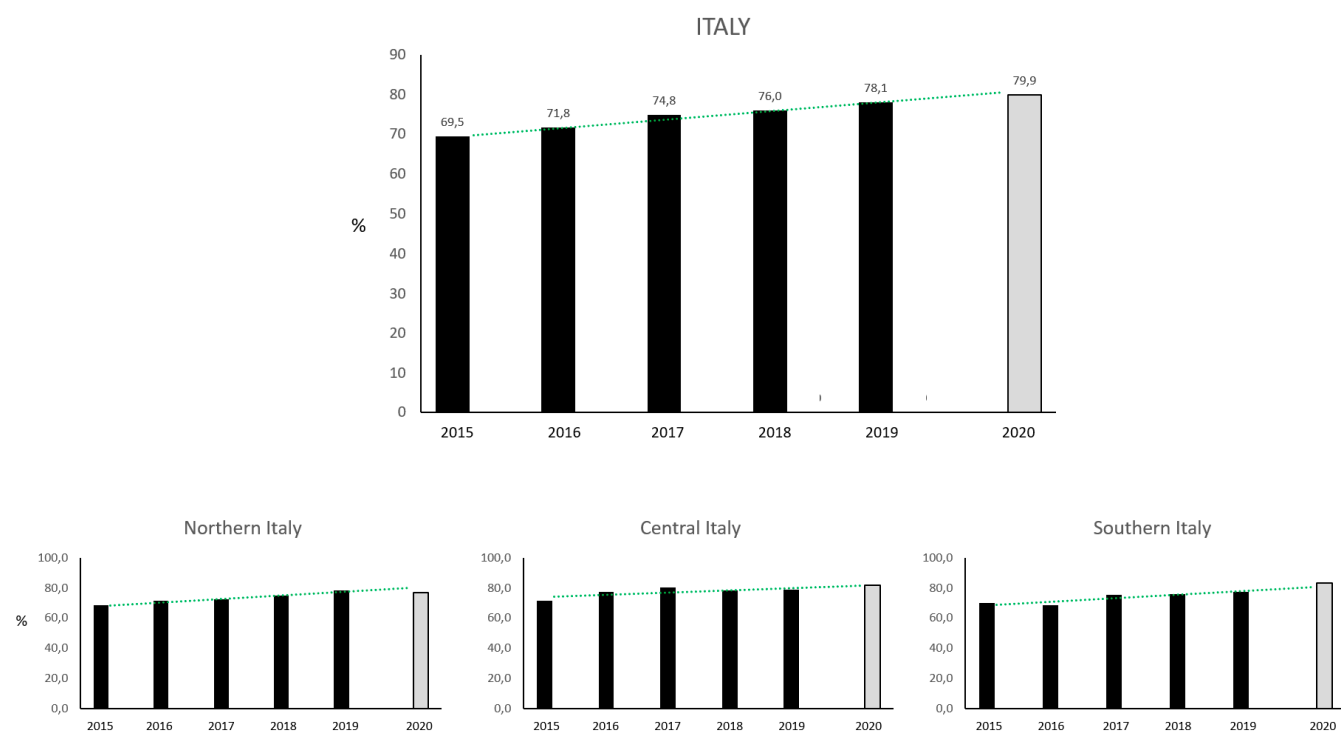

**Supplementary Figure S3.** Rates of PCI performed  $\leq 2$  days from hospital admission during the 2020 national outbreak and over the equivalent periods in the previous 5 years in Italy and by geographic regions.

**Supplementary Table S3.** Logistic regression model for 30 days mortality.

|                                          | <b>Crude OR</b> | <b>Adjusted OR</b> | <b>CI 95%</b> | <b>P value</b> |
|------------------------------------------|-----------------|--------------------|---------------|----------------|
| Age (years)                              | 1.1             | 1.1                | 1.066 - 1.074 | <0.0001        |
| Gender (females)                         | 2.6             | 1.2                | 1.126 - 1.329 | <0.0001        |
| Covid-19                                 | 4.3             | 4.5                | 3.098 - 6.450 | <0.0001        |
| Chronic coronary syndromes               | 2.0             | 1.3                | 1.151 - 1.516 | <0.0001        |
| Other previous cardiac surgery than CABG | 1.8             | 1.6                | 1.140 - 2.195 | 0.006          |
| Previous vascular surgery                | 2.5             | 1.5                | 1.228 - 1.721 | <0.0001        |
| Anemia (ind. adm.)                       | 1.4             | 0.6                | 0.445 - 0.686 | <0.0001        |
| Obesity (ind. adm.)                      | 0.4             | 0.6                | 0.447 - 0.901 | 0.011          |
| Diabetes                                 | 2.3             | 1.2                | 1.053 - 1.357 | 0.006          |
| Heart failure                            | 3.9             | 1.3                | 1.156 - 1.557 | <0.0001        |
| Cerebrovascular disease                  | 3.0             | 1.2                | 1.091 - 1.413 | <0.0001        |
| Chronic kidney disease                   | 3.5             | 1.3                | 1.091 - 1.512 | 0.003          |
| Previous PCI                             | 0.5             | 0.4                | 0.386 - 0.518 | <0.0001        |
| Malignant neoplasms                      | 2.1             | 1.4                | 1.222 - 1.561 | <0.0001        |
| Previous CABG                            | 0.7             | 0.5                | 0.414 - 0.719 | <0.0001        |
| PCI ≤2 days                              | 0.2             | 0.5                | 0.450 - 0.530 | <0.0001        |

CABG: coronary artery bypass grafting; PCI: percutaneous coronary intervention;

Note: ind. adm - comorbidity information retrieved at the index admission
